# Supplementary material
Source: PubMed Central journal article supplement (PMC7897288)
Supplement: NIHMS1655679-supplement-1.pdf [file NIHMS1655679-supplement-1.pdf]

## Journal of Hepatology

### CTAT methods

Tables for a “Complete, Transparent, Accurate and Timely account” (CTAT) are now mandatory for all revised submissions. The aim is to enhance the reproducibility of methods.

- Only include the parts relevant to your study
- Refer to the CTAT in the main text as ‘Supplementary CTAT Table’
- Do not add subheadings
- Add as many rows as needed to include all information
- Only include one item per row

If the CTAT form is not relevant to your study, please outline the reasons why:

|  |
|--|
|  |
|--|

#### 1.1 Antibodies

| Name            | Citation | Supplier                  | Cat no. | Clone no.            |
|-----------------|----------|---------------------------|---------|----------------------|
| NFATc3          |          | Santa Cruz Biotechnology  | sc-8405 | Mouse McAb           |
| HNF1 $\alpha$   |          | Santa Cruz Biotechnology  | sc-8986 | Rabbit polyclonal Ab |
| NFATc1          |          | Sigma-Aldrich             | MABS409 | Mouse McAb           |
| CD3             |          | Dako                      | A0452   | Rabbit polyclonal Ab |
| Lamin B1        |          | Cell Signaling Technology | 12586S  | Rabbit McAb          |
| Nucleoporin p62 |          | BD Biosciences            | 610497  | Mouse McAb           |
| GAPDH           |          | Sigma-Aldrich             | G8795   | Mouse McAb           |

#### 1.2 Cell lines

| Name     | Citation                                           | Supplier          | Cat no. | Passage no.              | Authentication test method                                |
|----------|----------------------------------------------------|-------------------|---------|--------------------------|-----------------------------------------------------------|
| Huh7-BAT | Higuchi, et al J Biol Chem 2001; 276(42): 38610-18 | Dr. Gregory Gores |         | <10 passage in our hands | Uptake of fluorescent and radioactive labelled bile acids |

#### 1.3 Organisms

| Name  | Citation                                    | Supplier     | Strain                                      | Sex          | Age         | Overall n number |
|-------|---------------------------------------------|--------------|---------------------------------------------|--------------|-------------|------------------|
| Mouse | Cai et al, JCI Insight 2017;2:e90780        | Jackson Labs | Wild-type C57BL/6                           | Male         | 10-20 weeks | >25              |
| Mouse | Cai et al, Am J Physiol GI 2014; 306:G670-6 | Jackson Labs | FVB.129P2- <i>Abcb4</i> <sup>tm1Bor/J</sup> | Male, female | 6-10 weeks  | >35              |

## 1.4 Sequence based reagents

| Name                      | Sequence                               | Supplier                 |
|---------------------------|----------------------------------------|--------------------------|
| Mouse Nfatc1 TaqMan assay | Proprietary to ABI, Cat# Mm00479445_m1 | Thermo Fisher Scientific |
| Mouse Nfatc2 TaqMan assay | Proprietary to ABI, Cat# Mm01240677_m1 | Thermo Fisher Scientific |
| Mouse Nfatc3 TaqMan assay | Proprietary to ABI, Cat# Mm01249200_m1 | Thermo Fisher Scientific |
| Mouse Nfatc4 TaqMan assay | Proprietary to ABI, Cat# Mm00452375_m1 | Thermo Fisher Scientific |
| Mouse Ccl2 TaqMan assay   | Proprietary to ABI, Cat# Mm00441242_m1 | Thermo Fisher Scientific |
| Mouse Cxcl1 TaqMan assay  | Proprietary to ABI, Cat# Mm00433859_m1 | Thermo Fisher Scientific |
| Mouse Cxcl2 TaqMan assay  | Proprietary to ABI, Cat# Mm00436450_m1 | Thermo Fisher Scientific |
| Mouse Cxcl10 TaqMan assay | Proprietary to ABI, Cat# Mm00445235_m1 | Thermo Fisher Scientific |
| Mouse Icam1 TaqMan assay  | Proprietary to ABI, Cat# Mm00516023_m1 | Thermo Fisher Scientific |
| Mouse Vcam1 TaqMan assay  | Proprietary to ABI, Cat# Mm01320970_m1 | Thermo Fisher Scientific |
| Mouse Egr1 TaqMan assay   | Proprietary to ABI, Cat# Mm00656724_m1 | Thermo Fisher Scientific |
| Mouse Cyp7a1 TaqMan assay | Proprietary to ABI, Cat# Mm00484152_m1 | Thermo Fisher Scientific |
| Human NFATc1 TaqMan assay | Proprietary to ABI, Cat# Hs00542678_m1 | Thermo Fisher Scientific |
| Human NFATc2 TaqMan assay | Proprietary to ABI, Cat# Hs00905451_m1 | Thermo Fisher Scientific |
| Human NFATc3 TaqMan assay | Proprietary to ABI, Cat# Hs00190046_m1 | Thermo Fisher Scientific |
| Human NFATc4 TaqMan assay | Proprietary to ABI, Cat# Hs00190037_m1 | Thermo Fisher Scientific |
| Human IL-8 TaqMan assay   | Proprietary to ABI, Cat# Hs00174103_m1 | Thermo Fisher Scientific |
|                           |                                        |                          |

## 1.5 Biological samples

| Description                                                                                 | Source                                                           | Identifier                                      |
|---------------------------------------------------------------------------------------------|------------------------------------------------------------------|-------------------------------------------------|
| Primary human hepatocytes                                                                   | Liver Tissue Cell Distribution System, University of Pittsburgh  | NIH Contract #N01-DK-7-0004 / HHSN267200700004C |
| Liver tissue explanted from patients with end-stage PBS or PSC, or deceased healthy donors. | Liver Tissue Cell Distribution System in University of Minnesota | NIH Contract # HSN276201200017C                 |

## 1.6 Deposited data

| Name of repository | Identifier | Link |
|--------------------|------------|------|
| N/A                |            |      |

## 1.7 Software

| Software name  | Manufacturer                 | Version |
|----------------|------------------------------|---------|
| GraphPad Prism | GraphPad                     | 8.4.    |
| ImageJ         | National Institute of Health | 1.51    |

## 1.8 Other (e.g. drugs, proteins, vectors etc.)

| Name             | Supplier                            |  |
|------------------|-------------------------------------|--|
| Cyclosporin A    | Sigma-Aldrich                       |  |
| FK506            | Cayman Chemical (Ann Arbor, MI)     |  |
| KN-62 and Inca-6 | Tocris Bioscience (Minneapolis, MN) |  |
| A285222          | AbbVie, Inc. (North Chicago, IL)    |  |

## 1.9 Please provide the details of the corresponding methods author for the manuscript:

Shi-Ying Cai, Ph.D., Liver Center, Yale University School of Medicine, 333 Cedar Street, 1080 LMP, New Haven, CT 06520. E-mail: [shi-ying.cai@yale.edu](mailto:shi-ying.cai@yale.edu); Tel: (203)785-3150; Fax: (203)785-7273 or James L. Boyer, M.D. Ensign Professor of Medicine, Liver Center, Yale University School of Medicine, 333 Cedar Street, 1080 LMP, New Haven, CT 06520-8019. email: [james.boyer@yale.edu](mailto:james.boyer@yale.edu); Tel: (203)785-5279; Fax: (203)785-7273.

## 2.0 Please confirm for randomised controlled trials all versions of the clinical protocol are included in the submission. These will be published online as supplementary information.

|  |
|--|
|  |
|--|
